# Supplementary material for: Characterization of TNF-induced cell death in Drosophila reveals caspase- and JNK-dependent necrosis and its role in tumor suppression
Source: PubMed Central journal article supplement (PMC6692325; doi:10.1038/s41419-019-1862-0), 2019-08-14

Figure S2

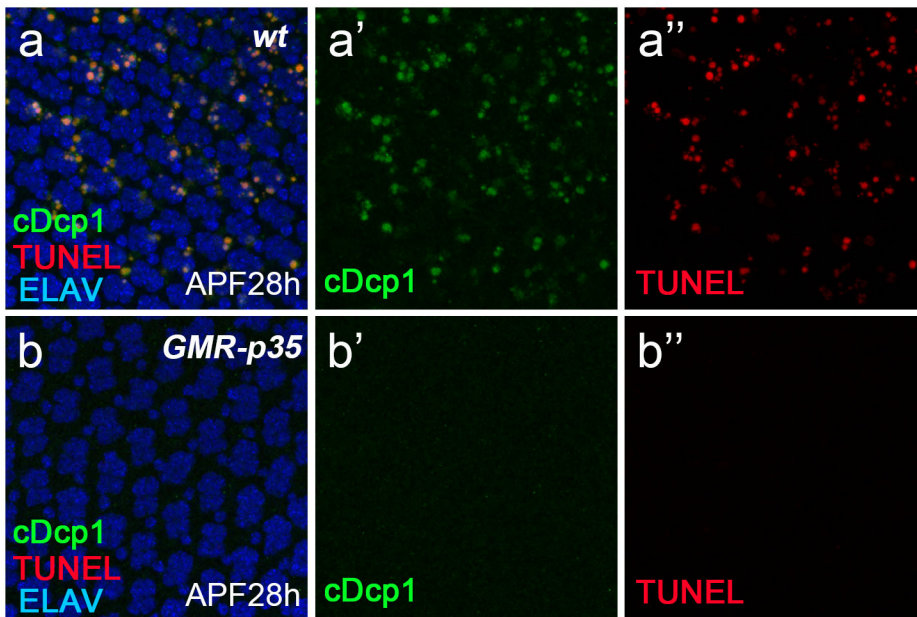

Supplement: 41419_2019_1862_MOESM3_ESM.pdf [file 41419_2019_1862_MOESM3_ESM.pdf]
